# Supplementary material
Source: HighWire-hosted journal article supplement (https://bmjopen.bmj.com/content/10/7/e038532)
Supplement: inline-supplementary-material-1 [file inline-supplementary-material-1.pdf]

prob.label

version 1.0

|\_|\_| / |\_|\_|

patNo. / initials principal investigator

## Impact of carbohydrate reduced nutrition in septic patients on ICU - a prospective randomized controlled trial

201\_|\_|\_|\_|\_|.

| Inclusion criteria                                                                                                                                                                                                                         | Yes                      | No                       |
|--------------------------------------------------------------------------------------------------------------------------------------------------------------------------------------------------------------------------------------------|--------------------------|--------------------------|
| • age $\geq$ 18 years                                                                                                                                                                                                                      | <input type="checkbox"/> | <input type="checkbox"/> |
| • Diagnosis of sepsis according to current Sepsis-3 definition: <ol style="list-style-type: none"> <li>1. Suspected or proven infection</li> <li>2. Organ dysfunction: increase of SOFA-score <math>\geq</math> 2scoring points</li> </ol> | <input type="checkbox"/> | <input type="checkbox"/> |
| • Inclusion during 36h after diagnosis of sepsis                                                                                                                                                                                           |                          |                          |
| • Mechanical ventilation <72h                                                                                                                                                                                                              |                          |                          |
| • Written informed consent or positive vote of an independent consultant                                                                                                                                                                   | <input type="checkbox"/> | <input type="checkbox"/> |

| Exclusion criteria                                                                                                                                                                                                                                                                                                                      | Yes                      | No                       |
|-----------------------------------------------------------------------------------------------------------------------------------------------------------------------------------------------------------------------------------------------------------------------------------------------------------------------------------------|--------------------------|--------------------------|
| • Refusal of the patient or lack of consent                                                                                                                                                                                                                                                                                             | <input type="checkbox"/> | <input type="checkbox"/> |
| • Lack of medical indication and/or contraindications to administration of enteral nutrition                                                                                                                                                                                                                                            | <input type="checkbox"/> | <input type="checkbox"/> |
| • Age < 18 years                                                                                                                                                                                                                                                                                                                        | <input type="checkbox"/> | <input type="checkbox"/> |
| • Anaemia (Hb < 8,0g/dl)                                                                                                                                                                                                                                                                                                                | <input type="checkbox"/> | <input type="checkbox"/> |
| • Relationship to the principal investigator (relatives, friends)                                                                                                                                                                                                                                                                       | <input type="checkbox"/> | <input type="checkbox"/> |
| • Pre-existing conditions <ul style="list-style-type: none"> <li>○ Insulin depended diabetes mellitus type I and II</li> <li>○ Other severe metabolic disorders or autoimmune disorders</li> <li>○ Known moderate to severe liver insufficiency or dysfunction</li> <li>○ Patients with severe refractory metabolic acidosis</li> </ul> | <input type="checkbox"/> | <input type="checkbox"/> |
| • Do not resuscitate order                                                                                                                                                                                                                                                                                                              | <input type="checkbox"/> | <input type="checkbox"/> |
| • Pregnancy or lactation period                                                                                                                                                                                                                                                                                                         | <input type="checkbox"/> | <input type="checkbox"/> |

- Copy patient documents! (medical history, comorbidity, long term medication, physical examination, ECG, vital signs, etc.) ☐ done
- ☐ male ☐ female height |\_|\_|\_| cm weight |\_|\_|\_|\_| kg BMI |\_|\_|\_| kg/m<sup>2</sup>
- blood pressure |\_|\_|\_| / |\_|\_| cardiac frequency |\_|\_|\_| /min temperature |\_|\_|\_| °C
- Pregnancy impossible ☐, if possible => see next line
 

Pregnancy test (urine) **result:** ☐ neg. ☐ pos. → exclusion
- Note participation in the study in medical record (i.e. PDMS)! ☐ done

03.06.2019

1.0 -

● **Studies related documentation**

- Medical history (space for description):

---



---

- Allergies:

---

- Surgeries during the last 5 years:

---

- Infective diseases during the last 12 months: YES ☐ / No ☐

- ICU parameters:

SOFA score (ascertained until day 14 or until release of ICU )

|              |              |              |
|--------------|--------------|--------------|
| Day 1 _____  | day 2 _____  | day 3 _____  |
| day 4 _____  | day 5 _____  | day 6 _____  |
| day 7 _____  | day 8 _____  | day 9 _____  |
| day 10 _____ | day 11 _____ | day 12 _____ |
| day 13 _____ | day 14 _____ |              |

- Vasopressor therapy (yes/no, ascertained until day 14 or until release of ICU)

|              |              |              |
|--------------|--------------|--------------|
| day 1 _____  | day 2 _____  | day 3 _____  |
| day 4 _____  | day 5 _____  | day 6 _____  |
| day 7 _____  | day 8 _____  | day 9 _____  |
| day 10 _____ | day 11 _____ | day 12 _____ |
| day 13 _____ | day 14 _____ |              |

- Mechanical ventilation (ascertained until day 14 or until release of ICU)

|              |              |              |
|--------------|--------------|--------------|
| day 1 _____  | day 2 _____  | day 3 _____  |
| day 4 _____  | day 5 _____  | day 6 _____  |
| day 7 _____  | day 8 _____  | day 9 _____  |
| day 10 _____ | day 11 _____ | day 12 _____ |
| day 13 _____ | day 14 _____ |              |

date 201\_\_|\_|\_|\_|\_|\_|\_|\_|

investigator's signature \_\_\_\_\_

2019/06/03

version1.0

## ▪ KDIGO-Score (ascertained until day 14 or until release of ICU)

|              |              |              |
|--------------|--------------|--------------|
| day 1 _____  | day 2 _____  | day 3 _____  |
| day 4 _____  | day 5 _____  | day 6 _____  |
| day 7 _____  | day 8 _____  | day 9 _____  |
| day 10 _____ | day 11 _____ | day 12 _____ |
| day 13 _____ | day 14 _____ |              |

## ▪ Immunosuppression (yes/no, ascertained until day 14 or until release of ICU)

|              |              |              |
|--------------|--------------|--------------|
| day 1 _____  | day 2 _____  | day 3 _____  |
| day 4 _____  | day 5 _____  | day 6 _____  |
| day 7 _____  | day 8 _____  | day 9 _____  |
| day 10 _____ | day 11 _____ | day 12 _____ |
| day 13 _____ | day 14 _____ |              |

## ▪ Renal dialysis (yes/no, ascertained until day 14 or until release of ICU)

|              |              |              |
|--------------|--------------|--------------|
| day 1 _____  | day 2 _____  | day 3 _____  |
| day 4 _____  | day 5 _____  | day 6 _____  |
| day 7 _____  | day 8 _____  | day 9 _____  |
| day 10 _____ | day 11 _____ | day 12 _____ |
| day 13 _____ | day 14 _____ |              |

## ▪ Antibiotics therapy (yes/no, ascertained until day 14 or until release of ICU)

|              |              |              |
|--------------|--------------|--------------|
| day 1 _____  | day 2 _____  | day 3 _____  |
| day 4 _____  | day 5 _____  | day 6 _____  |
| day 7 _____  | day 8 _____  | day 9 _____  |
| day 10 _____ | day 11 _____ | day 12 _____ |
| day 13 _____ | day 14 _____ |              |

date 201\_\_|\_|\_|\_|\_|\_|\_|

investigator's signature \_\_\_\_\_

2019/06/03

version1.0

▪ Secondary infections (yes/no, ascertained until day 14 or until release of ICU)

|              |              |              |
|--------------|--------------|--------------|
| day 1 _____  | day 2 _____  | day 3 _____  |
| day 4 _____  | day 5 _____  | day 6 _____  |
| day 7 _____  | day 8 _____  | day 9 _____  |
| day 10 _____ | day 11 _____ | day 12 _____ |
| day 13 _____ | day 14 _____ |              |

▪ Daily print out of routine laboratory investigations (\* incl. CMV+EBV-PCR )

|              |               |              |
|--------------|---------------|--------------|
| day 1 _____  | day 2 _____   | day 3 _____  |
| day 4 _____  | day 5 _____   | day 6 _____  |
| day 7* _____ | day 8 _____   | day 9 _____  |
| day 10 _____ | day 11 _____  | day 12 _____ |
| day 13 _____ | day 14* _____ |              |

▪ Daily print out of the vital signs' trend

|              |              |              |
|--------------|--------------|--------------|
| day 1 _____  | day 2 _____  | day 3 _____  |
| day 4 _____  | day 5 _____  | day 6 _____  |
| day 7 _____  | day 8 _____  | day 9 _____  |
| day 10 _____ | day 11 _____ | day 12 _____ |
| day 13 _____ | day 14 _____ |              |

▪ Study-related blood sampling

|             |              |
|-------------|--------------|
| day 1 _____ | day 14 _____ |
|-------------|--------------|

date 201\_\_|\_|\_|\_|\_|\_|

investigator's signature \_\_\_\_\_

2019/06/03

version1.0
